# Supplementary material
Source: publisher site journal article supplement (http://kjim.org/upload/media/kjim-2022-408-Supplementary-Table-1.pdf)
Supplement: Supplementary file 1 [file kjim-2022-408-Supplementary-Table-1.pdf]

**Supplementary Table 1. Incidence of grade 3 and 4 adverse events<sup>a)</sup> by age groups ( $\leq 65$  vs.  $> 65$  yr)**

| Variable               | Total (n = 66) | $\leq 65$ yr (n = 43) | $> 65$ yr (n = 23) | <i>p</i> value <sup>b)</sup> |
|------------------------|----------------|-----------------------|--------------------|------------------------------|
| Hematological toxicity |                |                       |                    |                              |
| Neutropenia            | 32 (48.5)      | 22 (51.2)             | 10 (43.5)          | 0.552                        |
| Anemia                 | 9 (13.6)       | 8 (18.6)              | 1 (4.4)            | 0.146                        |
| Thrombocytopenia       | 5 (7.6)        | 4 (9.4)               | 1 (4.4)            | 0.651                        |
| Infections, pneumonia  | 8 (12.1)       | 4 (9.3)               | 4 (17.4)           | 0.435                        |
| Infections, others     | 3 (4.6)        | 1 (2.3)               | 2 (8.7)            | 0.276                        |
| Others                 | 6 (9.1)        | 4 (9.3)               | 2 (8.7)            | $> 0.999$                    |

n, number.

<sup>a)</sup>Common Terminology Criteria for Adverse Events (CTCAE) Version 5.0.

<sup>b)</sup>Chi-squared test or Fisher's exact test as appropriate.
